# Supplementary material for: Multi-trait discovery and fine-mapping of lipid loci in 125,000 individuals of African ancestry
Source: PubMed Central journal article supplement (PMC10480211; doi:10.1038/s41467-023-41271-0), 2023-09-05

## Supplementary Information

### Multi-trait discovery and fine-mapping of lipid loci in 125,000 individuals of African ancestry

Abram Bunya Kamiza<sup>1,2,3,\*</sup>, Sounkou M, Touré<sup>1,4,\*</sup>, Feng Zhou<sup>5,\*</sup>, Opeyemi Soremekun<sup>1</sup>, Cheickna Cissé<sup>4,7</sup>, Mamadou Wélé<sup>2,7</sup>, Aboubacrine M. Touré<sup>7</sup>, Oyekanmi Nashiru<sup>6</sup>, Manuel Corpas<sup>8</sup>, Moffat Nyirenda<sup>9</sup>, Mia Crampin<sup>2</sup>, Jeffrey Shaffer<sup>10</sup>, Seydou Doumbia<sup>4,11</sup>, Eleftheria Zeggini<sup>12,13</sup>, Andrew P Morris<sup>14</sup>, Jennifer L Asimit<sup>5</sup>, Tinashe Chikowore<sup>3,15</sup>, Segun Fatumo<sup>1,6,12,16</sup>

<sup>1</sup>The African Computational Genomic (TACG) Research Group, MRC/UVRI and LSHTM, Uganda

<sup>2</sup>Malawi Epidemiology and Intervention Research Unit, Lilongwe, Malawi

<sup>3</sup>Sydney Brenner Institute for Molecular Bioscience, Faculty of Health Sciences, University of the Witwatersrand, Johannesburg, South Africa

<sup>4</sup>African Center of Excellence in Bioinformatics, University of Sciences, Techniques and Technologies of Bamako, Bamako, Mali

<sup>5</sup>MRC Biostatistics Unit, University of Cambridge, UK

<sup>6</sup>H3Africa Bioinformatics Network (H3ABioNet) Node, Center for Genomics Research and Innovation, NABDA/FMST, Abuja

<sup>7</sup>Faculty of Sciences and Techniques, University of Sciences, Techniques and Technologies of Bamako, Bamako, Mali

<sup>8</sup>University of Westminster, London

<sup>9</sup>Medical Research Council/Uganda Virus Research Institute and London School of Hygiene & Tropical Medicine Uganda Research Unit

<sup>10</sup>Department of Biostatistics and Data Science, School of Public Health and Tropical Medicine, Tulane University, New Orleans, Louisiana, United States of America

<sup>11</sup>Faculty of Medicine and Odonto-stomatology, University of Sciences, Techniques and Technologies of Bamako, Bamako, Mali

<sup>12</sup>Institute of Translational Genomics, Helmholtz Zentrum München - German Research Center for Environmental Health, Neuherberg, Germany

<sup>13</sup>TUM School of Medicine, Translational Genomics, Technical University of Munich and Klinikum Rechts der Isar, Munich, Germany

<sup>14</sup>Centre for Genetics and Genomics Versus Arthritis, Centre for Musculoskeletal Research, University of Manchester, Manchester, UK

<sup>15</sup>MRC/Wits Developmental Pathways for Health Research Unit, Department of Pediatrics, Faculty of Health Sciences, University of the Witwatersrand, Johannesburg, South Africa

<sup>16</sup>Department of Non-Communicable Disease Epidemiology, London School of Hygiene and Tropical Medicine, London, United Kingdom

\* These authors contributed equally.

**Supplementary Fig.1** Forest plot showing a comparison of some genetic variants. APCDR: African Partnership for Chronic Disease Research consortium in Africa (N=~14,000). AWI-Gen; Africa Wits-INDEPTH Partnership for Genomic Research (N=~11,000). GLGC; Global lipid genetic consortium of African ancestry (N=~99,000). P: Two-tailed p-value, not adjusted for multiple comparisons, developed using R. The error bars show odds ratio  $\pm$  95% confidence intervals.

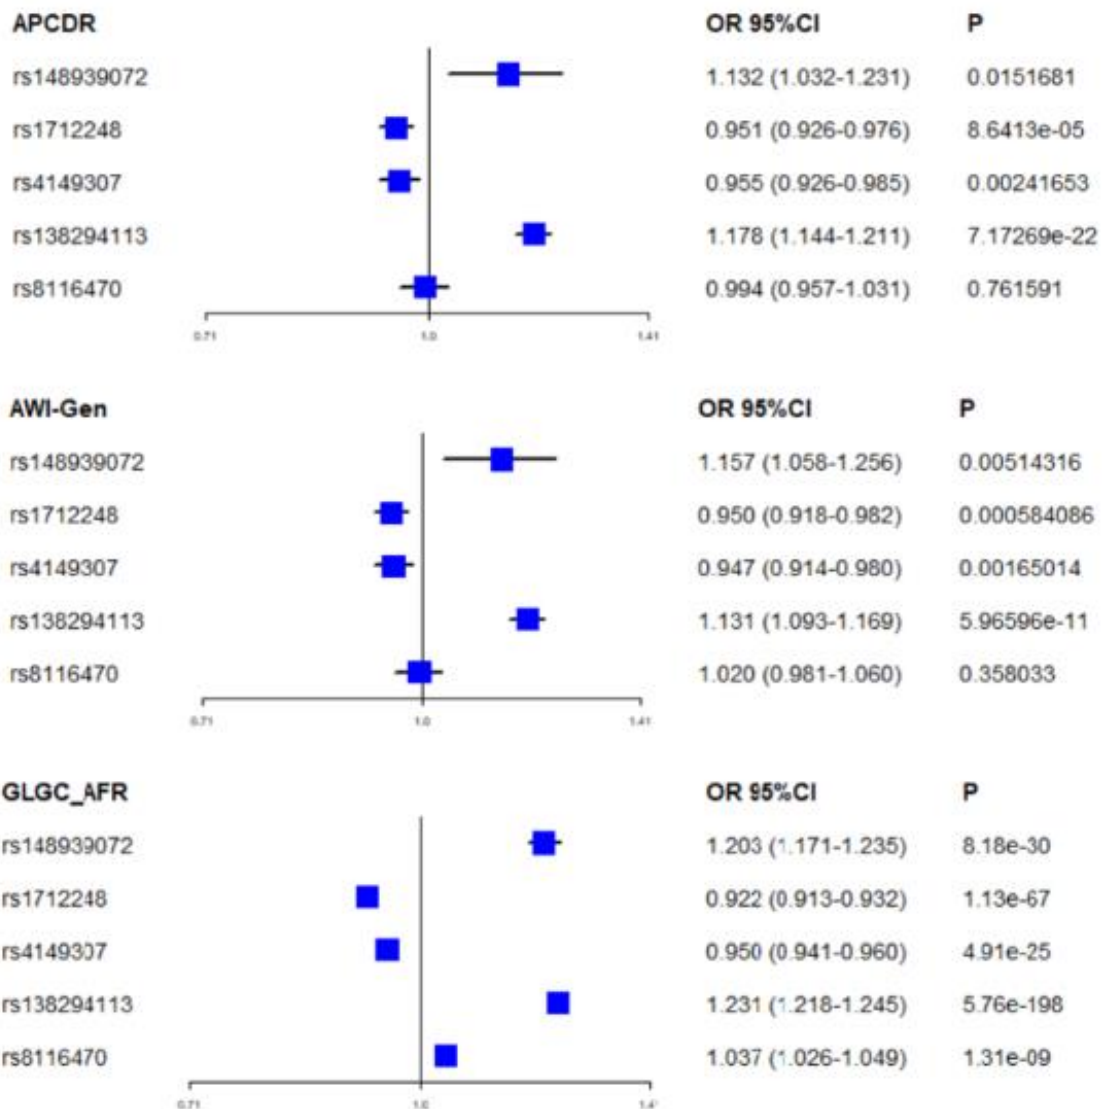

**Supplementary Fig.2** Locus zoom plot for top novel loci associated with lipid traits in individuals of African ancestry from the MTAG analysis (N~125,000). **(a)** Locuszoom plot showing associations around the *TMEM64* region. **(b)** Locuszoom plot showing associations around *ZNF782* region. **(c)** Locuszoom plot showing associations around the intergenic region between *MSANTD3* and *TMEFF1*. **(d)** Locuszoom plot showing associations around the *LOC100507346* region.

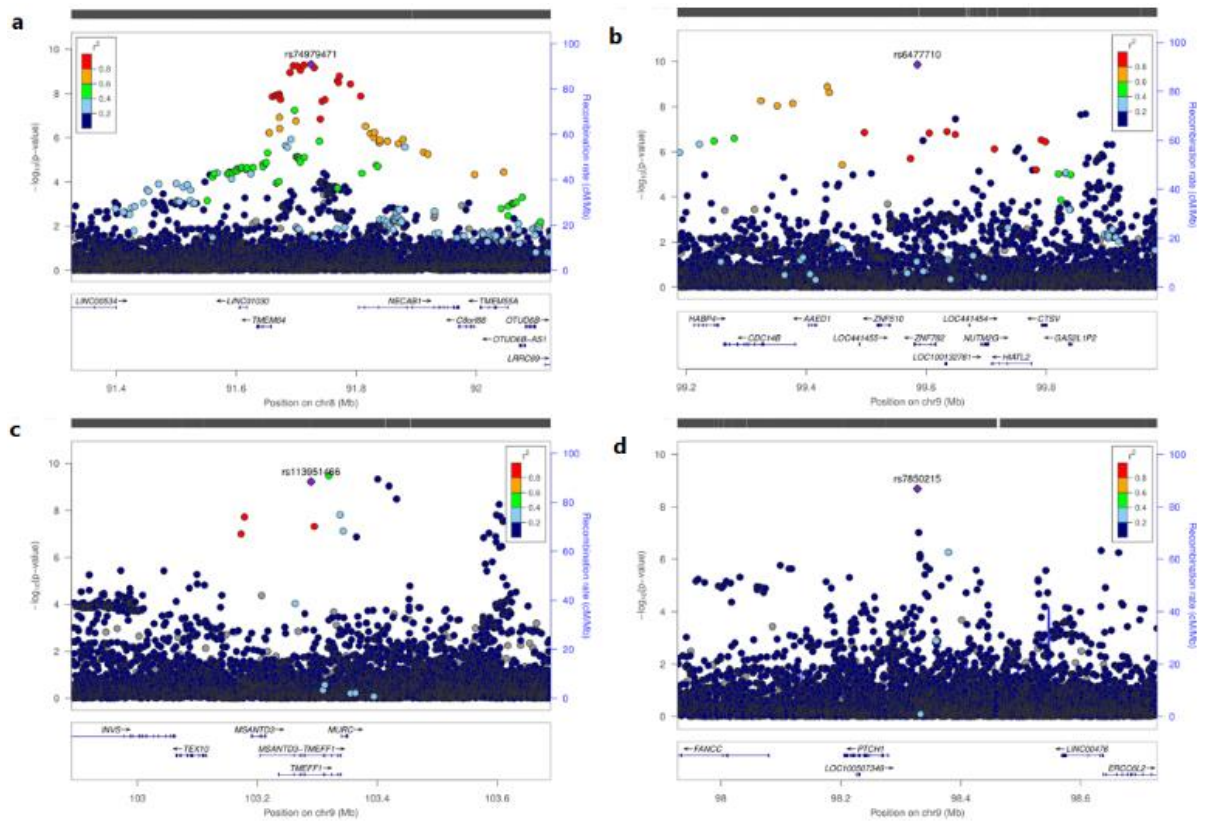

**Supplementary Fig.3** Venn diagram showing the number of independent genetic loci associated with lipid traits identified by meta-analysis and MTAG approach in individuals of African ancestry. The blue colour is the number of independent genetic loci for meta-analysis GWAS and yellow color is the number of independent genetic loci for MTAG analysis. The overlapping area between blue and yellow are number of loci shared between meta-analysis GWAS and MTAG. HDL; high-density lipoprotein, TG: triglycerides, TC: total cholesterol.

**HDL**

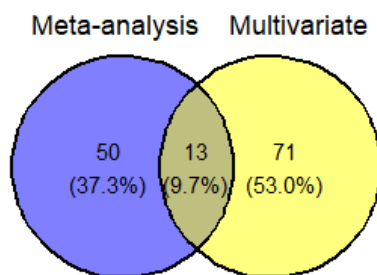

**TG**

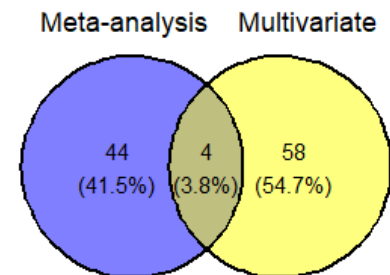

**TC**

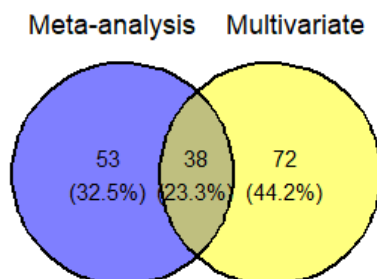

**Supplementary Fig.4** Regional association plots of 16:56889590-57089590 for LDL and TG, integrated with fine-mapping MPP. (a) rs247616 with marginal posterior probability of causality (MPP) =0.501 for single trait LDL. (b) rs183130 with MPP= 0.999 of causality with multi-trait LDL. (c) rs4783961 with MPP=0.332 of causality for single trait TG. (d) rs183130 with MPP=0.999 of causality for multi-trait TG. We display p-values by location height (y-axis) and MPP by diameter of the points. Variants that are the same colour may be thought of as interchangeable and are said to belong to the same SNP group; variants in different groups have  $r^2 > 0.6$  and rarely appear in a model together. This figure was generated using the web tool flashfm-ivs (<http://shiny.mrc-bsu.cam.ac.uk/apps/flashfm-ivs/>)

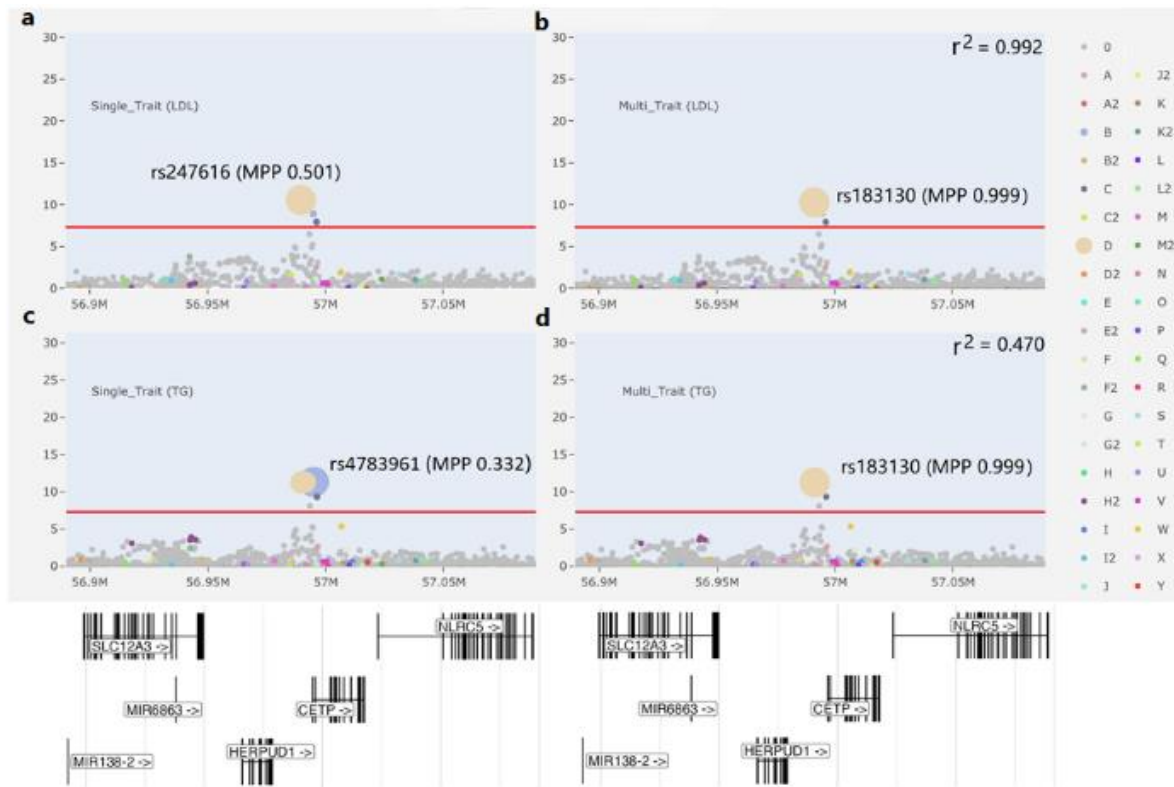

**Supplementary Fig.5** Regional association plots of 21:46753876-46975775 for TC, TG, and HDL, integrated with fine-mapping. (a) rs77974343 with marginal posterior probability of causality (MPP) =0.275 for single trait TC. (b) rs116386571 with MPP= 0.989 of causality with multi-trait TC (c) rs116386571 with MPP=1 of causality for single trait TG. (d) rs116386571 with MPP=1 of causality for multi-trait TG. (e) rs116386571 with MPP=0.863 of causality for single trait HDL.(f) rs116386571 with MPP=0.999 of causality for multi-trait HDL. We display p-values by location height (y-axis) and MPP by diameter of the points. Variants that are the same colour may be thought of as interchangeable and are said to belong to the same SNP group; variants in different groups have  $r^2 > 0.6$  and rarely appear in a model together. This figure was generated using the web tool flashfm-ivs (<http://shiny.mrc-bsu.cam.ac.uk/apps/flashfm-ivs/>)

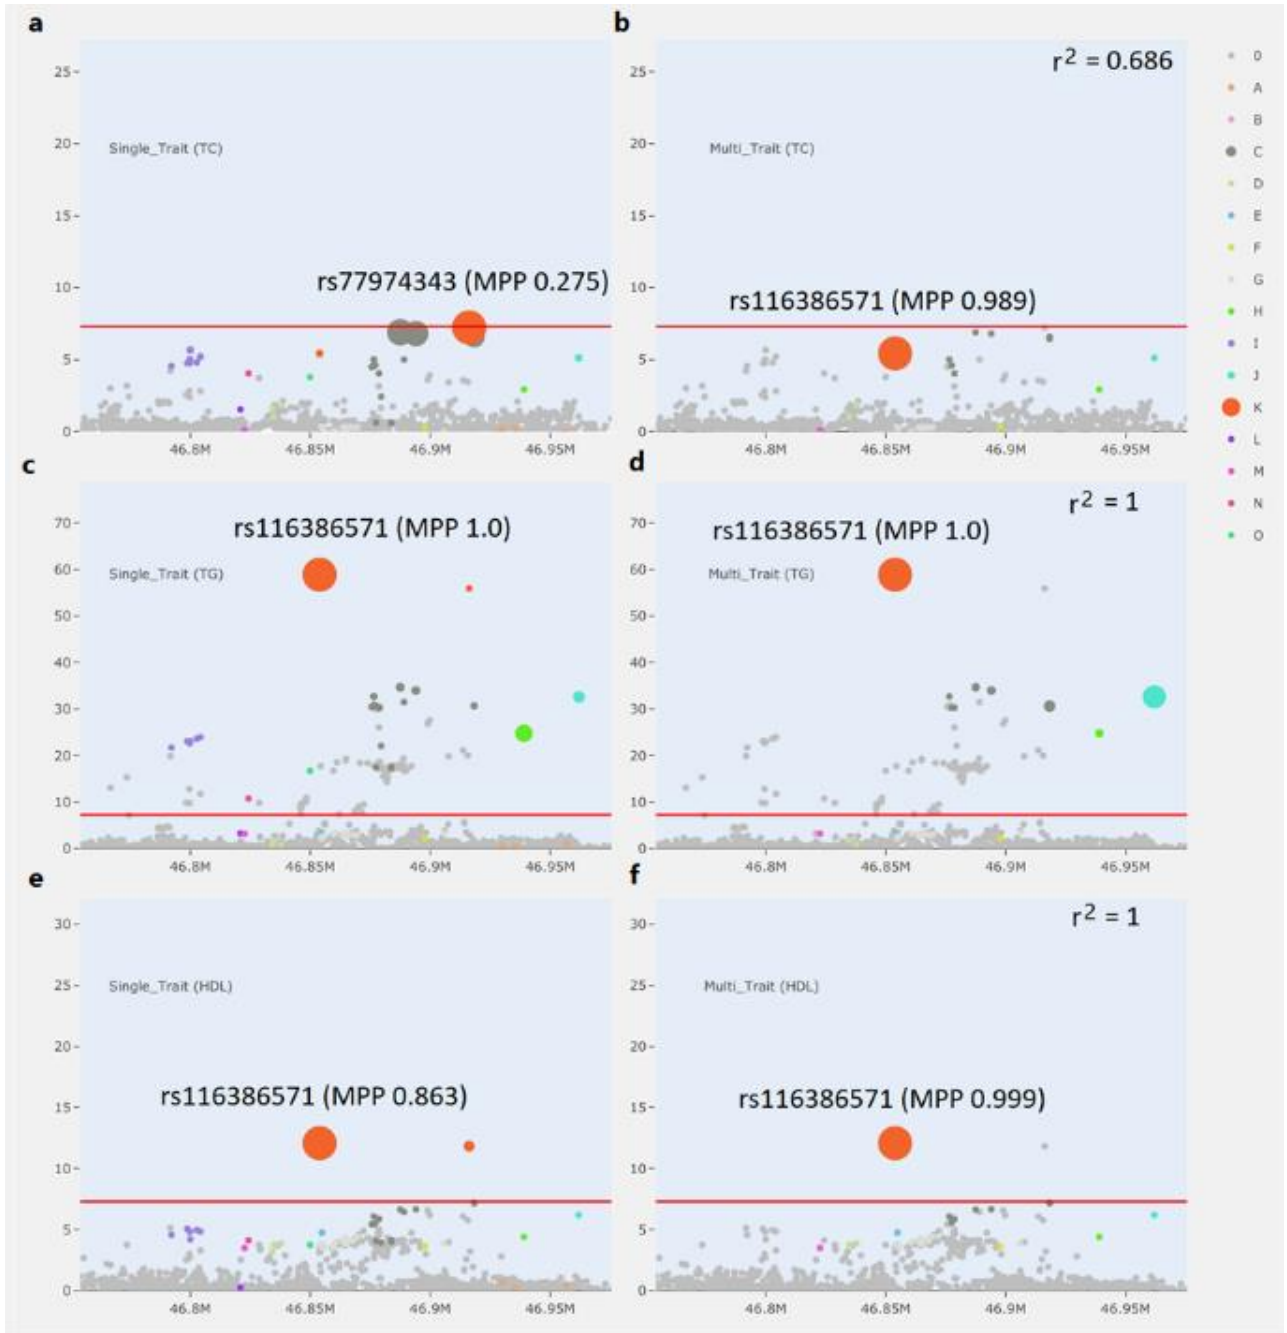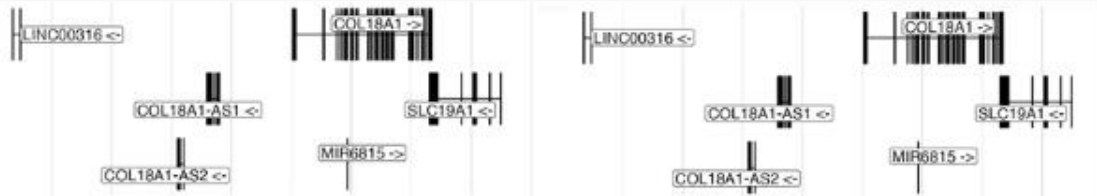

Supplement: 41467_2023_41271_MOESM1_ESM.pdf [file 41467_2023_41271_MOESM1_ESM.pdf]
