# Supplementary material for: Multi-trait discovery and fine-mapping of lipid loci in 125,000 individuals of African ancestry
Source: PubMed Central journal article supplement (PMC10480211; doi:10.1038/s41467-023-41271-0), 2023-09-05
Supplement: 41467_2023_41271_MOESM3_ESM.pdf [file 41467_2023_41271_MOESM3_ESM.pdf]

## Description of Additional Supplementary Files

File Name: Supplementary Data 1

Description: Independent genetic loci associated with lipid trait in individuals of African ancestry (N= $\sim$ 125,000). P-values are two-tailed calculated using GWAMA and not adjusted for multiple comparisons.

File Name: Supplementary Data 2

Description: Independent genetic loci associated with HDL, TG and TC in individuals of African ancestry (N= $\sim$ 125,000). P-values are two-tailed calculated using MTAG and not adjusted for multiple comparisons.

File Name: Supplementary Data 3

Description: Comparison of MTAG novel loci among individuals of African ancestry, GLGC European and East Asian ancestry.

File Name: Supplementary Data 4

Description: Fine mapping between multi-trait fine-mapping and single-trait fine-mapping

File Name: Supplementary Data 5

Description: Details of variants prioritised by JAM or flashfm for the lipids traits, including nearest genes, functional annotations, and prioritisation status in the GLGC analyses

File Name: Supplementary Data 6

Description: Colocalization of novel meta-analysis of genome-wide association studies with expression quantitative trait loci GTEx v8

File Name: Supplementary Data 7

Description: Colocalization of novel multi-trait analysis of genome-wide association studies analysis with expression quantitative trait loci GTEx v8
